# Supplementary material for: A CT-derived deep neural network predicts for programmed death ligand-1 expression status in advanced lung adenocarcinomas
Source: PubMed Central journal article supplement — Ann Transl Med. 2020 Aug;8(15):930. doi: 10.21037/atm-19-4690 (PMC7475404; doi:10.21037/atm-19-4690), 2020-08
Supplement: atm-08-15-930-dss.pdf [file atm-08-15-930-dss.pdf]

| Data Sharing Statement        |                                                                                             |                                                    |
|-------------------------------|---------------------------------------------------------------------------------------------|----------------------------------------------------|
| Article information           | <a href="http://dx.doi.org/10.21037/atm-19-4690">http://dx.doi.org/10.21037/atm-19-4690</a> |                                                    |
| Section                       | Question                                                                                    | Authors' Response<br>(place "-" if not applicable) |
| Data collected for your study | Will the data collected for your study be made available to others?                         | Yes                                                |
|                               | If not, would you like to share the reason for your decision?                               | -                                                  |
|                               | What data in particular will be shared?                                                     | All                                                |
|                               | Any additional information about data?                                                      | -                                                  |
|                               | How or where can the data be obtained?                                                      | By contacting the corresponding author             |
|                               | When will data availability begin?                                                          | When the article is online                         |
|                               | When will data availability end?                                                            | No time limit                                      |
| Supporting documents          | Will any supporting documents be available?                                                 | Yes                                                |
|                               | Which supporting documents?                                                                 | Supplementary Table S1                             |
|                               | Any additional information about supporting documents?                                      | No                                                 |
|                               | How or where can supporting documents be obtained?                                          | By contacting the corresponding author             |
|                               | When will supporting documents availability begin?                                          | When the article is online                         |
|                               | When will supporting documents availability end?                                            | No time limit                                      |
| Restrictions                  | To whom will data be available?                                                             | Anyone with a reasonable reason                    |
|                               | For what type of analysis or purpose?                                                       | No restrictions                                    |
|                               | By what mechanism?                                                                          | -                                                  |
|                               | Any other restrictions?                                                                     | -                                                  |
| Additional information        |                                                                                             | -                                                  |
